# Supplementary material
Source: publisher site journal article supplement (https://www.dovepress.com/article/256662)
Supplement: Supplementary file 1 [file get_supplementary_file.php]

Supplementary Table 1. Incidence of common cancers as first primary cancer and as second primary cancer, and respective relative risks (RRs) in men

| First primary cancer | | | | Second primary cancer after *in situ* SCC | | | | | |
| --- | --- | --- | --- | --- | --- | --- | --- | --- | --- |
| Cancer | Number of cases | Standardized rate 1/ 100,000 | Rank1 | Number of cases | Standardized rate 2/ 100,000 | Rank2 | RR | 95% CI | |
| Prostate | 180129 | 96.3 | 1 | 1856 | 115.6 | 1 | 1.20 | 1.15 | 1.26 |
| Colorectum | 56845 | 31.8 | 2 | 629 | 43.6 | 3 | 1.37 | 1.27 | 1.49 |
| Lung | 40237 | 23.8 | 3 | 346 | 32.4 | 4 | 1.36 | 1.22 | 1.51 |
| Bladder | 34922 | 19.2 | 4 | 368 | 23.2 | 7 | 1.21 | 1.10 | 1.35 |
| Melanoma | 21437 | 14.3 | 5 | 453 | 53.1 | 2 | **3.71** | 3.38 | 4.08 |
| NHL | 17929 | 11.4 | 6 | 242 | 23.8 | 6 | **2.09** | 1.84 | 2.38 |
| Leukemia | 16607 | 11.3 | 7 | 225 | 24.1 | 5 | **2.13** | 1.87 | 2.43 |
| Nervous system | 14030 | 11.1 | 8 | 42 | 10.9 | 10 | 0.98 | 0.72 | 1.33 |
| Kidney | 13629 | 8.8 | 9 | 108 | 12.3 | 9 | 1.40 | 1.15 | 1.69 |
| Stomach | 13441 | 7.4 | 10 | 120 | 9 | 11 | 1.21 | 1.01 | 1.45 |
| UAT | 11002 | 7.2 | 11 | 144 | 17.5 | 8 | **2.43** | 2.06 | 2.87 |
| Liver | 10747 | 6.3 | 12 | 85 | 7.7 | 12 | 1.23 | 0.99 | 1.52 |
| Myeloma | 7002 | 4.1 | 13 | 63 | 4.9 | 15 | 1.20 | 0.93 | 1.54 |
| Endocrine | 5478 | 4 | 14 | 24 | 4.7 | 16 | 1.17 | 0.78 | 1.75 |
| Connective tissue | 3461 | 2.4 | 15 | 61 | 7.6 | 13 | **3.16** | 2.45 | 4.09 |
| Hodgkin lymphoma | 2374 | 2 | 16 | 13 | 5.1 | 14 | **2.57** | 1.48 | 4.46 |
| Thyroid | 2172 | 1.6 | 17 | 12 | 2.3 | 17 | 1.43 | 0.81 | 2.54 |
| Small intestine | 2337 | 1.5 | 18 | 20 | 2 | 19 | 1.34 | 0.86 | 2.09 |
| Male genital | 1753 | 1.1 | 19 | 24 | 2.1 | 18 | 1.93 | 1.29 | 2.89 |
| Breast | 778 | 0.5 | 20 | 7 | 0.6 | 20 | 1.15 | 0.55 | 2.43 |
| All* | 500232 | 257.7 | - | 5197 | 360.8 | - | 1.40 | 1.36 | 1.44 |

*Skin cancer is removed from all cancers; some rare cancers, not listed in this Table are included.

SCC, squamous cell carcinoma, NHL, non-Hodgkin lymphoma, UAT, upper aerodigestive tract.

Bolding shows RRs>2.00.

Supplementary Table 2. Incidence of common cancers as first primary cancer and as second primary cancer, and respective relative risks (RRs) in women

| First primary cancer | | | | Second primary cancer after *in situ* SCC | | | | | |
| --- | --- | --- | --- | --- | --- | --- | --- | --- | --- |
| Cancer | Number of cases | Standardized rate 1/ 100,000 | Rank1 | Number of cases | Standardized rate 2/ 100,000 | Rank2 | RR | 95% CI | |
| Breast | 128594 | 81.3 | 1 | 1021 | 100.0 | 1 | 1.23 | 1.16 | 1.31 | |
| Colorectum | 51003 | 23.8 | 2 | 725 | 31.9 | 3 | 1.34 | 1.25 | 1.45 | |
| Lung | 27671 | 15.7 | 3 | 238 | 18.7 | 4 | 1.19 | 1.04 | 1.35 | |
| Endometrium | 26916 | 15.2 | 4 | 235 | 16.9 | 5 | 1.11 | 0.97 | 1.26 | |
| Melanoma | 21477 | 15 | 5 | 429 | 50.4 | 2 | **3.36** | 3.05 | 3.70 | |
| Nervous system | 15058 | 11.7 | 6 | 77 | 14.7 | 6 | 1.26 | 1.00 | 1.57 | |
| Ovary | 17268 | 11.1 | 7 | 131 | 14.4 | 7 | 1.30 | 1.09 | 1.54 | |
| Leukemia | 12708 | 7.9 | 8 | 189 | 13.7 | 8 | 1.74 | 1.50 | 2.01 | |
| NHL | 14076 | 7.7 | 9 | 212 | 13.1 | 9 | 1.70 | 1.48 | 1.95 | |
| Endocrine | 10713 | 7.3 | 10 | 53 | 7.0 | 11 | 0.96 | 0.73 | 1.26 | |
| Cervix | 9796 | 7.3 | 11 | 32 | 6.1 | 15 | 0.83 | 0.59 | 1.18 | |
| Bladder | 11164 | 5.2 | 12 | 155 | 6.6 | 12 | 1.27 | 1.08 | 1.49 | |
| Kidney | 8799 | 5 | 13 | 82 | 6.2 | 13 | 1.24 | 1.00 | 1.55 | |
| Liver | 10284 | 4.9 | 14 | 81 | 4.5 | 16 | 0.92 | 0.74 | 1.14 | |
| Thyroid | 5440 | 4.2 | 15 | 32 | 6.1 | 14 | 1.45 | 1.02 | 2.06 | |
| Stomach | 8322 | 3.8 | 16 | 94 | 4.4 | 17 | 1.17 | 0.95 | 1.43 | |
| UAT | 6262 | 3.6 | 17 | 117 | 7.8 | 10 | **2.17** | 1.80 | 2.61 | |
| Myeloma | 5477 | 2.7 | 18 | 62 | 3.1 | 20 | 1.16 | 0.90 | 1.49 | |
| Connective tissue | 2723 | 1.8 | 19 | 38 | 3.6 | 19 | **2.02** | 1.46 | 2.79 | |
| Hodgkin lymphoma | 1850 | 1.7 | 21 | 12 | 3.7 | 18 | **2.18** | 1.23 | 3.88 | |
| Female genital | 3824 | 1.7 | 20 | 69 | 2.7 | 21 | 1.61 | 1.26 | 2.04 | |
| Small intestine | 1932 | 1 | 22 | 23 | 1.4 | 22 | 1.38 | 0.91 | 2.08 | |
| All* | 438740 | 235.6 | - | 4581 | 318.1 | - | 1.35 | 1.31 | 1.39 | |

*Skin cancer is removed from all cancers; some rare cancers, not listed in this Table are included.

SCC, squamous cell carcinoma, NHL, non-Hodgkin lymphoma, UAT, upper aerodigestive tract.

Bolding shows RRs>2.00.
